# Supplementary material for: Reaction of FeaqII with Peroxymonosulfate and Peroxydisulfate in the Presence of Bicarbonate: Formation of FeaqIV and Carbonate Radical Anions
Source: PubMed Central journal article supplement (PMC10134498; doi:10.1021/acs.est.3c00182), 2023-04-13
Supplement: es3c00182_si_001.pdf [file es3c00182_si_001.pdf]

## Supporting Information

### **Reaction of $\text{Fe}^{\text{II}}_{\text{aq}}$ with Peroxymonosulfate and Peroxydisulfate in Presence of Bicarbonate: Formation of $\text{Fe}^{\text{IV}}_{\text{aq}}$ and Carbonate Radical Anions**

Aswin Kottapurath Vijay,<sup>a,b</sup> Vered Marks,<sup>c</sup> Amir Mizrahi,<sup>d</sup> Yinghao Wen,<sup>e</sup> Xingmao Ma,<sup>e</sup>  
Virender K. Sharma,<sup>f</sup> Dan Meyerstein\*<sup>a,b</sup>

<sup>a</sup> Department of Chemical Sciences and The Radical Research Center Ariel University,  
Ariel 40700, Israel.

E-mail: [danm@ariel.ac.il](mailto:danm@ariel.ac.il)

<sup>b</sup> Chemistry Department, Ben-Gurion University, Beer-Sheva 8410501, Israel

<sup>c</sup> Department of Chemical Sciences, Ariel University, Ariel 40700, Israel

<sup>d</sup> Chemistry Department, Nuclear Research Centre Negev, Beer-Sheva 84190, Israel

<sup>e</sup> Department of Civil and Environmental Engineering, Texas A&M University,  
College Station, Texas, 77843, United States

<sup>f</sup> Program for the Environment and Sustainability: Department of Environmental and  
Occupational Health, Texas A&M University, College Station, Texas 77843, United States

**Pages:21, Table:1, Figures:17**

36  
37  
38  
39  
40  
41  
42  
43  
44  
45  
46  
47  
48  
49  
50  
51  
52  
53  
54  
55  
56  
57  
58  
59  
60  
61  
62  
63  
64  
65  
66  
67  
68  
69  
70  
71  
72  
73  
74  
75  
76  
77  
78  
79  
80  
81  
82  
83  
84  
85  
86  
87  
88  
89  
90  
91  
92  
93

## Table of contents

|                 |    |
|-----------------|----|
| Table S1.....   | 3  |
| Figure S1.....  | 4  |
| Figure S2.....  | 5  |
| Figure S3.....  | 6  |
| Figure S4.....  | 7  |
| Figure S5.....  | 8  |
| Figure S6.....  | 9  |
| Figure S7.....  | 10 |
| Figure S8.....  | 10 |
| Figure S9.....  | 11 |
| Figure S10..... | 12 |
| Figure S11..... | 13 |
| Figure S12..... | 14 |
| Figure S13..... | 15 |
| Text S1.....    | 16 |
| Text S2.....    | 17 |
| Text S3.....    | 18 |
| Figure S14..... | 19 |
| Figure S15..... | 19 |
| Figure S16..... | 20 |
| Figure S17..... | 21 |

94 **Table S1.** Six different setups used to determine the degradation efficiencies of SMX and SDM

95

96

| # | Treatment                                          | [PMS] <sub>0</sub> (mM) | [PDS] <sub>0</sub> (mM) | [Fe <sup>II</sup> <sub>aq</sub> ] <sub>0</sub> (mM) | [bicarbonate] <sub>0</sub> (mM) |
|---|----------------------------------------------------|-------------------------|-------------------------|-----------------------------------------------------|---------------------------------|
| 1 | PMS alone                                          | 0.04                    | 0                       | 0                                                   | 0                               |
| 2 | Fe <sup>II</sup> <sub>aq</sub> - PMS               | 0.04                    | 0                       | 0.2                                                 | 0                               |
| 3 | Fe <sup>II</sup> <sub>aq</sub> - PMS - bicarbonate | 0.04                    | 0                       | 0.2                                                 | 0.5                             |
| 4 | PDS alone                                          | 0                       | 1.0                     | 0                                                   | 0                               |
| 5 | Fe <sup>II</sup> <sub>aq</sub> - PDS               | 0                       | 1.0                     | 2.0                                                 | 0                               |
| 6 | Fe <sup>II</sup> <sub>aq</sub> - PDS - bicarbonate | 0                       | 1.0                     | 2.0                                                 | 5.0                             |

97

98

99

100

101

102

103

104

105

106

107

108

109

110

111

112

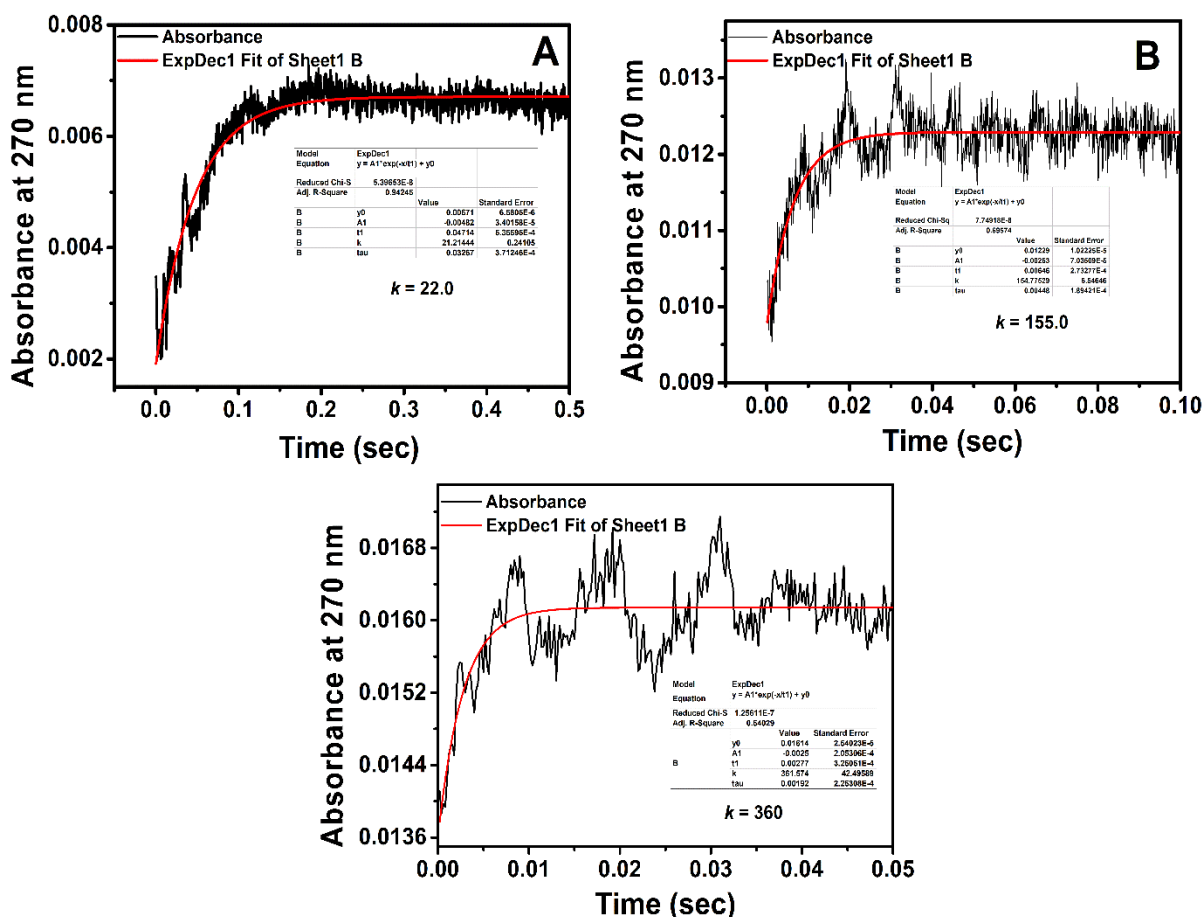

113

114 **Figure S1.** Formation of Fe(III) as a function of time during the reaction of  $\text{Fe}(\text{H}_2\text{O})_6^{2+}$  with

115 PMS at different concentrations of PMS while keeping a constant low concentration of  $\text{HCO}_3^-$ .

116 (A) [PMS] = 0.05 mM, (B) [PMS] = 0.10 mM, and (C) [PMS] = 0.20 mM. (Experimental

117 initial concentrations in the Fenton solutions:  $[\text{Fe}^{II}] = 0.020$  mM,  $[\text{HCO}_3^-] = 0.50$  mM.

118

119

120

121

122

123

124

125

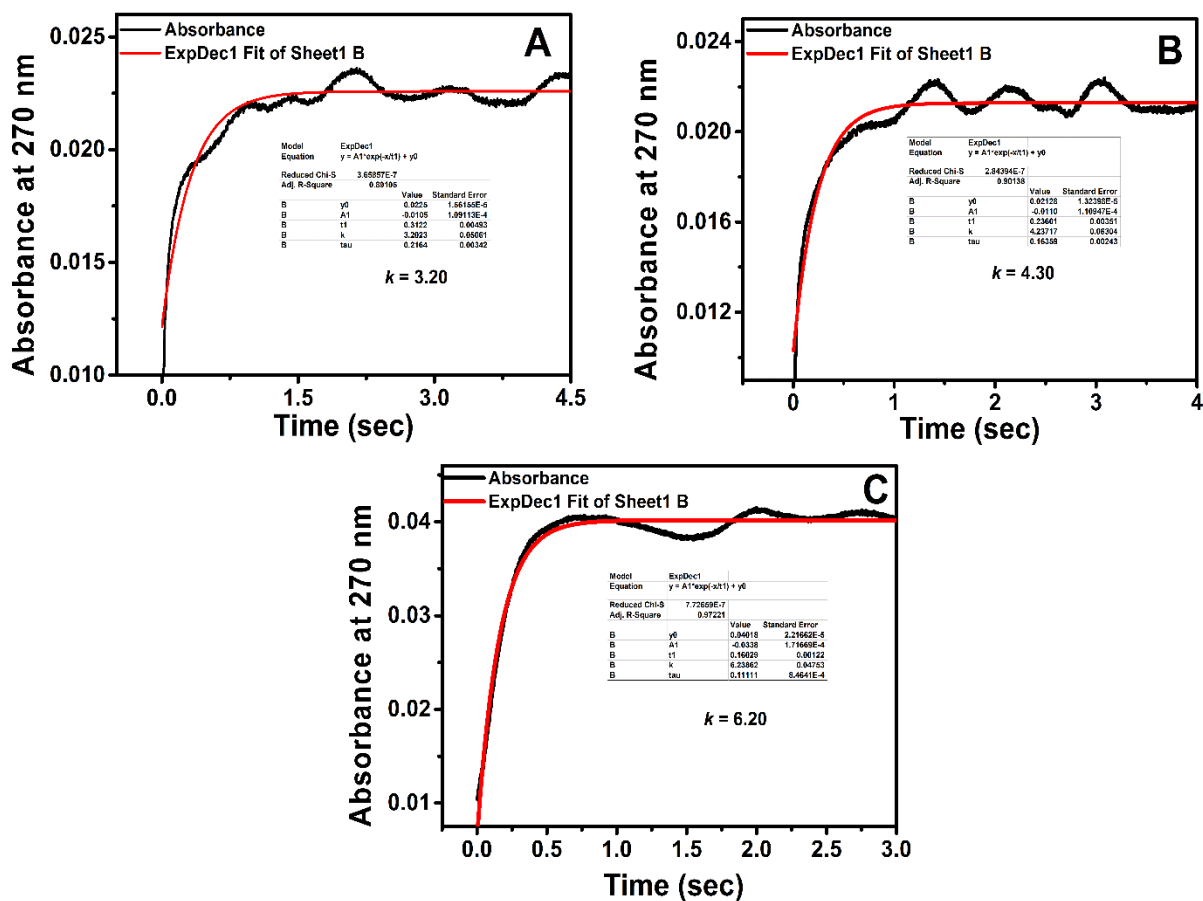

126

127

128 **Figure S2.** Formation of Fe(III) as a function of time during the reaction of  $\text{Fe}(\text{H}_2\text{O})_6^{2+}$  with  
 129 PDS at different concentrations of PDS while keeping a constant concentration of  $\text{HCO}_3^-$ . (A)  
 130  $[\text{PDS}] = 1.0 \text{ mM}$ , (B)  $[\text{PDS}] = 2.0 \text{ mM}$ , and (C)  $[\text{PDS}] = 3.0 \text{ mM}$ . (Experimental initial  
 131 concentrations in the Fenton solutions:  $[\text{Fe}^{II}] = 0.10 \text{ mM}$ ,  $[\text{HCO}_3^-] = 8.0 \text{ mM}$ ).

132

133

134

135

136

137

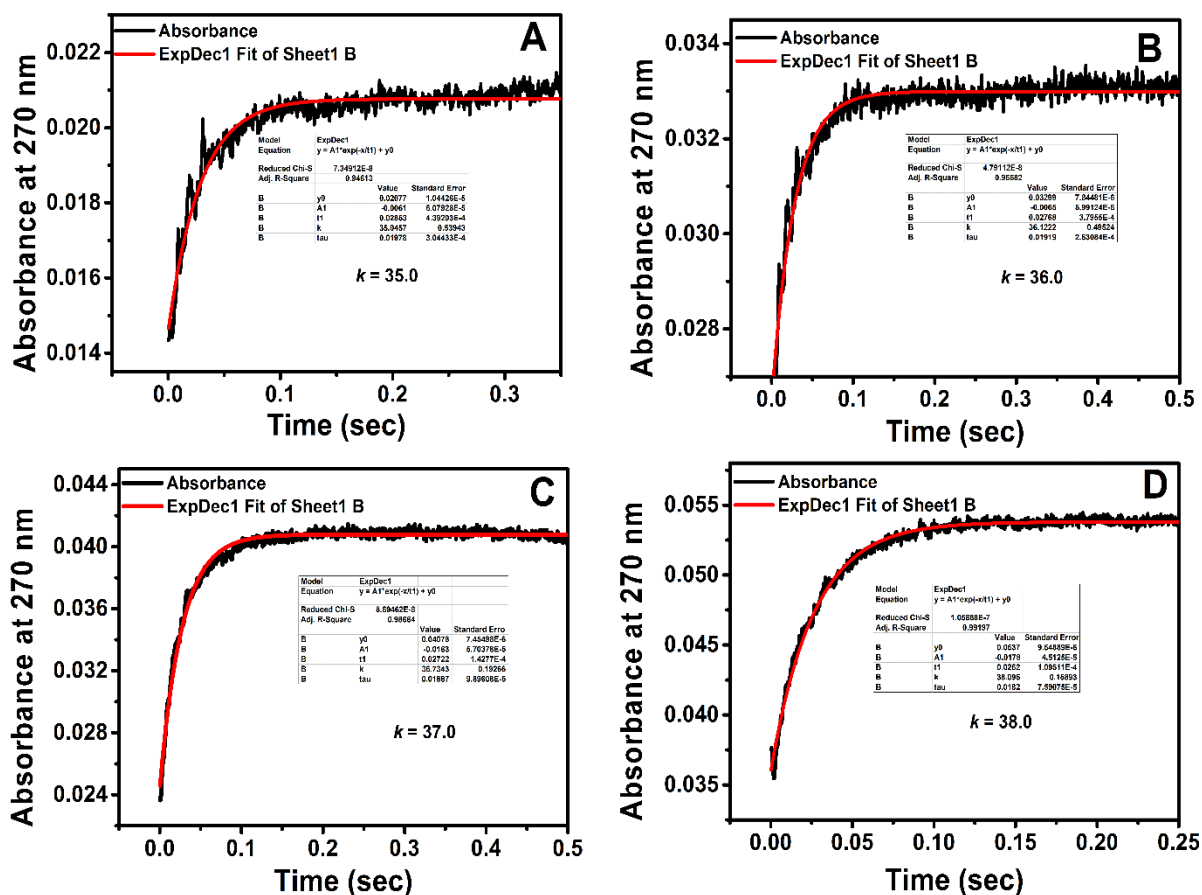

138

139

140 **Figure S3.** Typical kinetic curves of the formation of Fe(III) during the reaction of  $Fe(H_2O)_6^{2+}$

141 with PMS at different concentrations of  $Fe^{II}_{aq}$  under a constant concentration of low  $HCO_3^-$ .

142 (A)  $[Fe^{II}_{aq}] = 0.02$  mM, (B)  $[Fe^{II}_{aq}] = 0.04$  mM, (C)  $[Fe^{II}_{aq}] = 0.06$  mM, and (D)  $[Fe^{II}_{aq}] = 0.08$

143 mM (Experimental initial concentrations in the Fenton solutions:  $[PMS] = 0.10$  mM and

144  $[HCO_3^-] = 0.30$  mM).

145

146

147

148

149

150

151

152

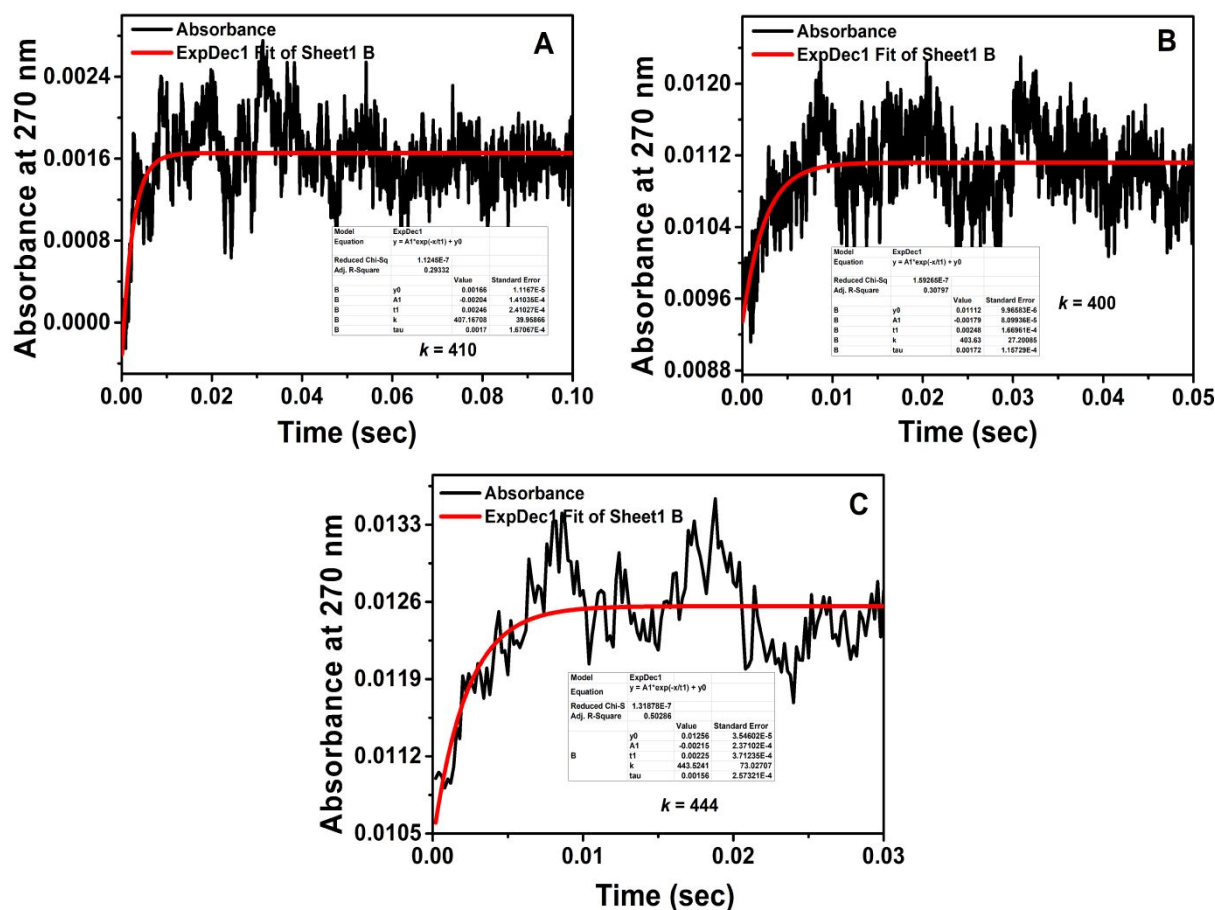

153

154 **Figure S4.** Typical kinetic curves of the formation of Fe(III) during the reaction of Fe(H<sub>2</sub>O)<sub>6</sub><sup>2+</sup>

155 with PMS at different concentrations of Fe<sup>II</sup><sub>aq</sub> under a constant concentration of high HCO<sub>3</sub><sup>-</sup>:

156 (A) [Fe<sup>II</sup><sub>aq</sub>] = 0.02 mM, (B) [Fe<sup>II</sup><sub>aq</sub>] = 0.04 mM and (C) [Fe<sup>II</sup><sub>aq</sub>] = 0.08 mM (Experimental initial

157 concentrations in the Fenton solutions: [PMS] = 0.10 mM and [HCO<sub>3</sub><sup>-</sup>] = 0.60 mM).

158

159

160

161

162

163

164

165

166

167

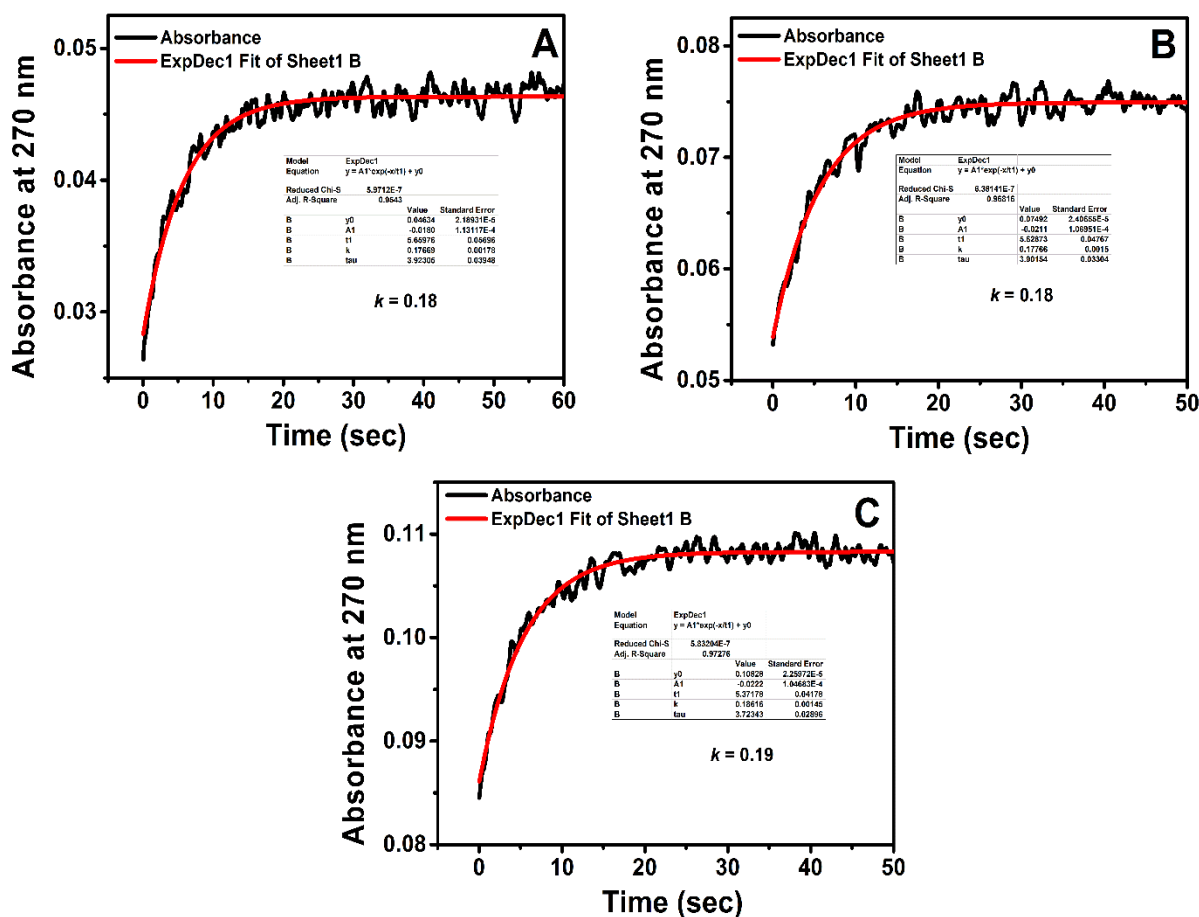

168  
 169 **Figure S5.** Typical kinetic curves of the formation of Fe(III) during the reaction of Fe(H<sub>2</sub>O)<sub>6</sub><sup>2+</sup>  
 170 with PDS at different concentrations of Fe<sup>II</sup><sub>aq</sub> under a constant concentration of low HCO<sub>3</sub><sup>-</sup>.  
 171 (A) [Fe<sup>II</sup><sub>aq</sub>] = 0.10 mM, (B) [Fe<sup>II</sup><sub>aq</sub>] = 0.20 mM, and (C) [Fe<sup>II</sup><sub>aq</sub>] = 0.40 mM Fe<sup>II</sup><sub>aq</sub>. (Experimental  
 172 initial concentrations in the Fenton solutions: [PDS] = 1.0 mM, [HCO<sub>3</sub><sup>-</sup>] = 2.0 mM)

173  
 174  
 175  
 176  
 177  
 178  
 179  
 180  
 181  
 182



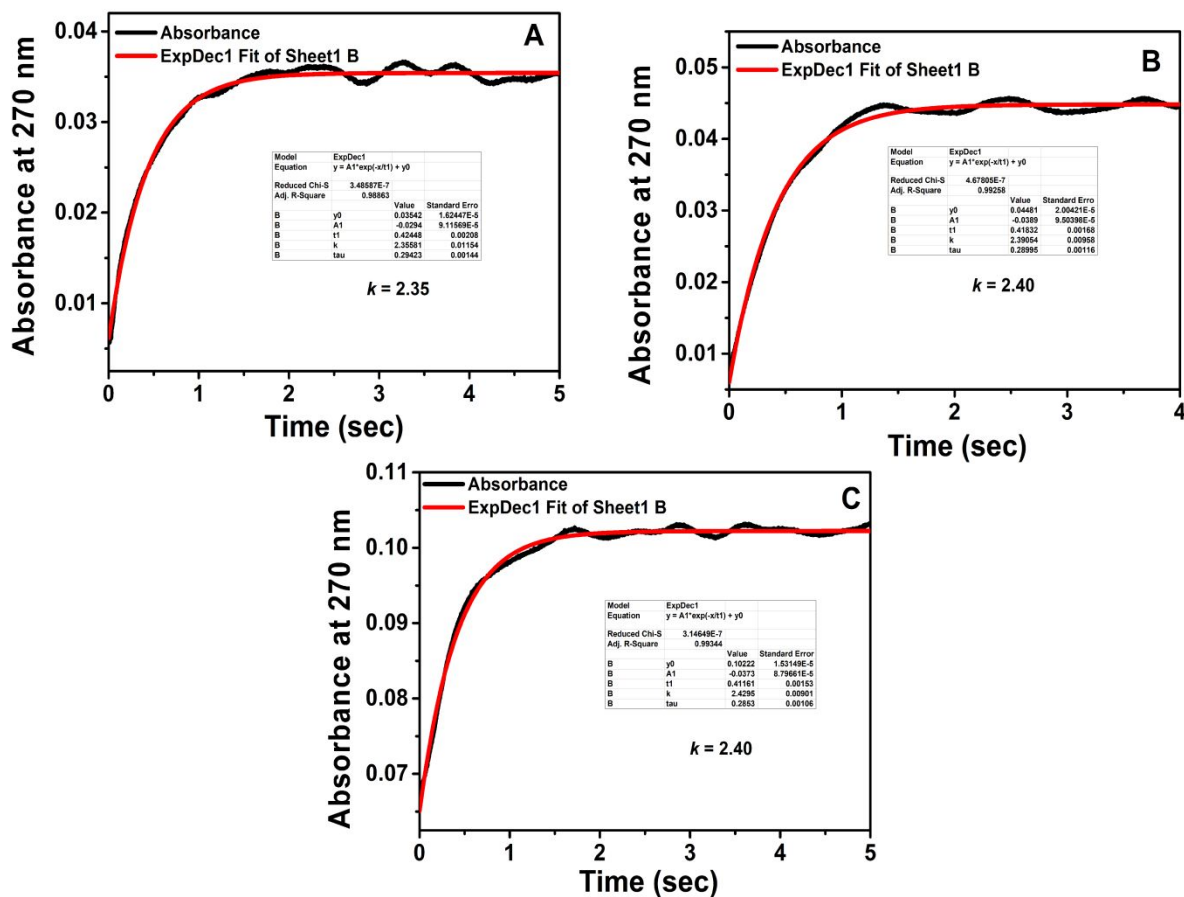

183

184 **Figure S6.** Typical kinetic curves of the formation of  $Fe(III)$  during the reaction of  $Fe(H_2O)_6^{2+}$

185 with PDS at different concentrations of  $Fe^{II}_{aq}$  under a constant concentration of high  $HCO_3^-$ .

186 (A)  $[Fe^{II}_{aq}] = 0.10$  mM, (B)  $[Fe^{II}_{aq}] = 0.20$  mM, and (C)  $[Fe^{II}_{aq}] = 0.40$  mM  $Fe^{II}_{aq}$ . (Experimental

187 initial concentrations in the Fenton solutions:  $[PDS] = 1.0$  mM,  $[HCO_3^-] = 5.0$  mM)

188

189

190

191

192

193

194

195

196

197

198

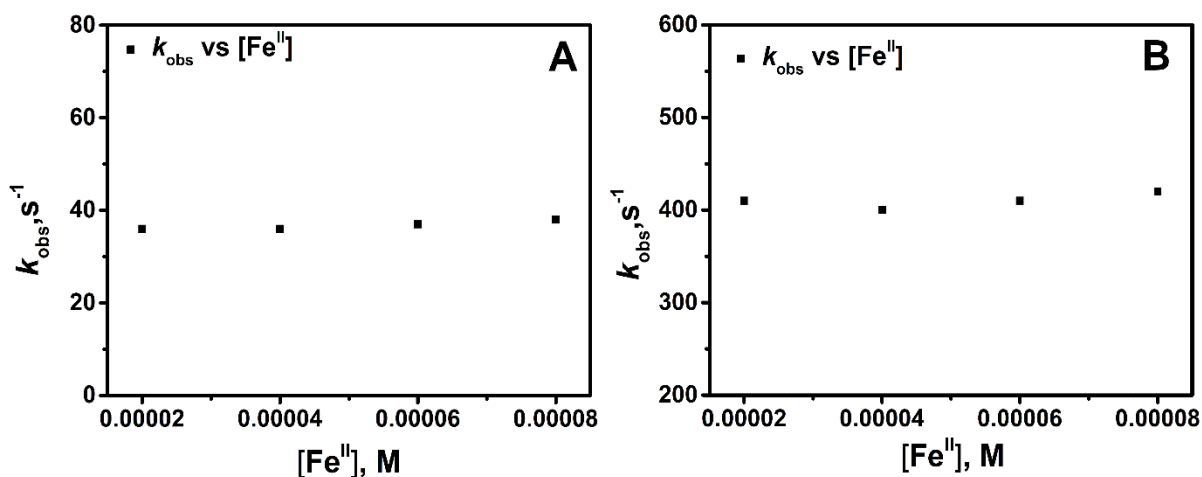

199

200

201

202 **Figure S7.** Dependence of  $k_{\text{obs}}$  at pH 7.40 on the concentrations of  $\text{Fe}^{\text{II}}_{\text{aq}}$ , at a constant

203 concentration of PMS (A)  $[\text{HCO}_3^-] = 0.30 \text{ mM}$  (Low  $[\text{HCO}_3^-]$ ) and (B)  $[\text{HCO}_3^-] = 0.60 \text{ mM}$

204 (High  $[\text{HCO}_3^-]$ ). Here in both cases,  $[\text{PMS}] = 0.10 \text{ mM}$

205

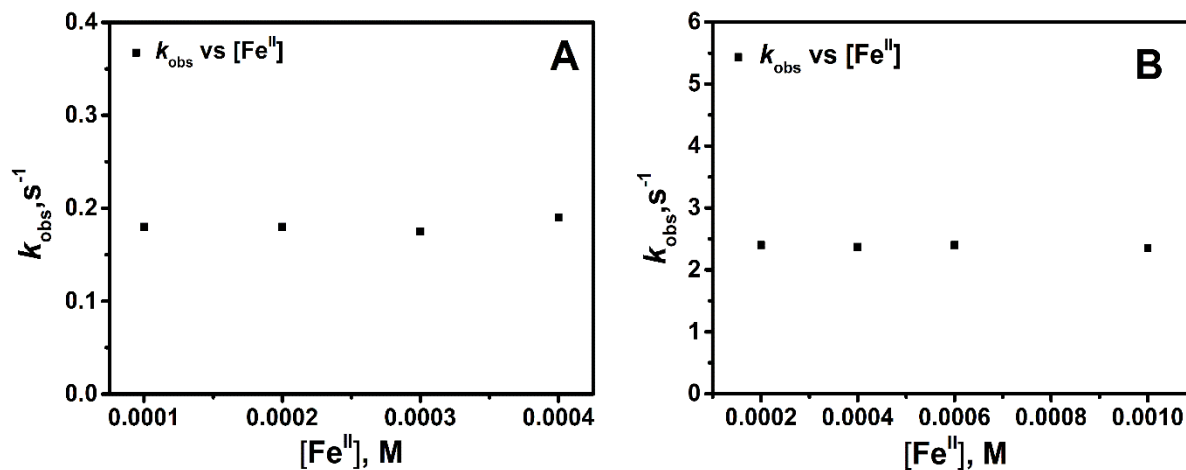

206

207 **Figure S8.** Dependence of  $k_{\text{obs}}$  at pH 7.40 on the concentrations of  $\text{Fe}^{\text{II}}_{\text{aq}}$ , at a constant

208 concentration of PDS (A)  $[\text{HCO}_3^-] = 2.0 \text{ mM}$  (Low  $[\text{HCO}_3^-]$ ) and (B)  $[\text{HCO}_3^-] = 5.0 \text{ mM}$  (High

209  $[\text{HCO}_3^-]$ ). Here in both cases,  $[\text{PDS}] = 1.0 \text{ mM}$

210

211

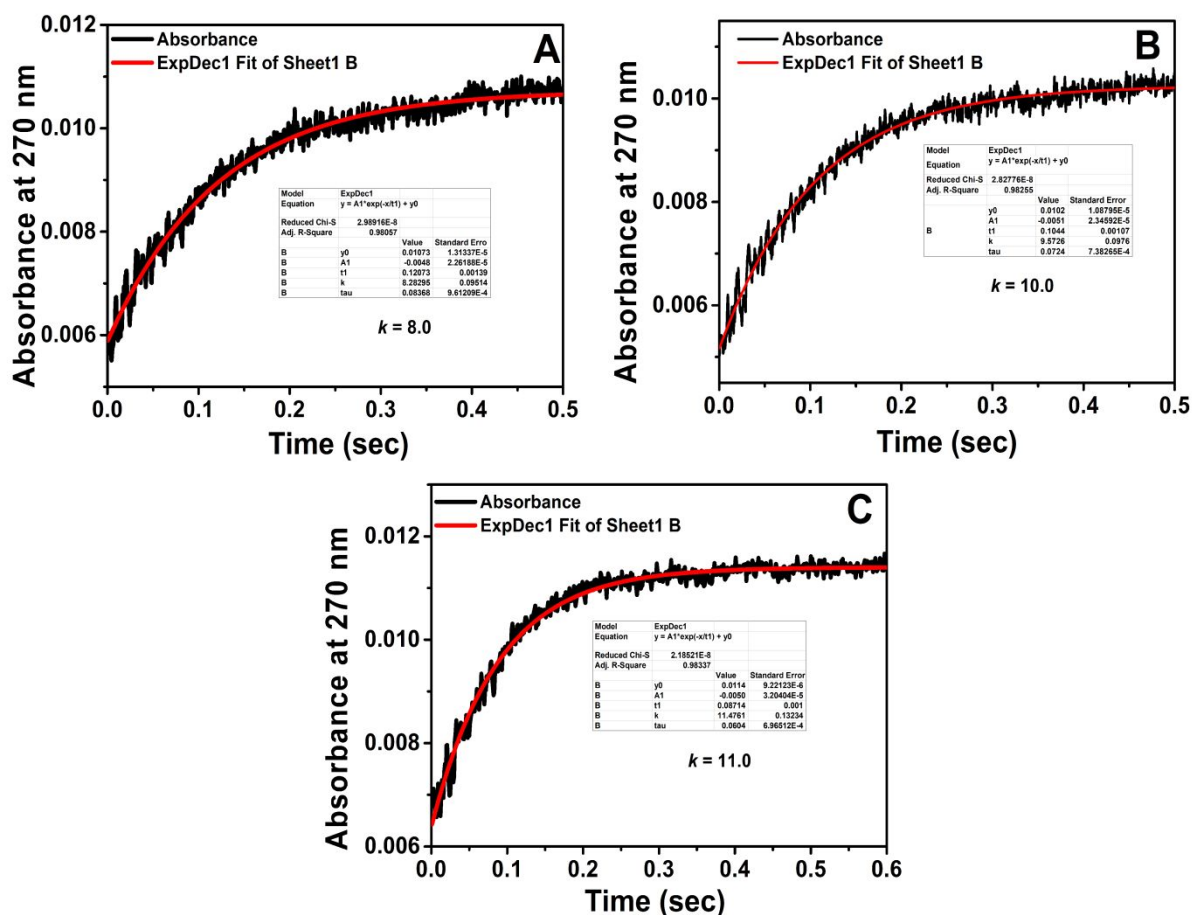

212

213 **Figure S9.** Kinetic curves of the formation of Fe(III) during the reaction of  $\text{Fe}(\text{H}_2\text{O})_6^{2+}$  with  
 214 PMS in the absence of bicarbonate at different pH's (A) pH = 5.80, (B) pH = 7.0 and (C) pH  
 215 = 8.40. (Experimental initial concentrations in the Fenton solutions:  $[\text{PMS}] = 0.20 \text{ mM}$ ,  $[\text{Fe}^{\text{II}}_{\text{aq}}]$   
 216 =  $0.020 \text{ mM}$ )

217

218

219

220

221

222

223

224

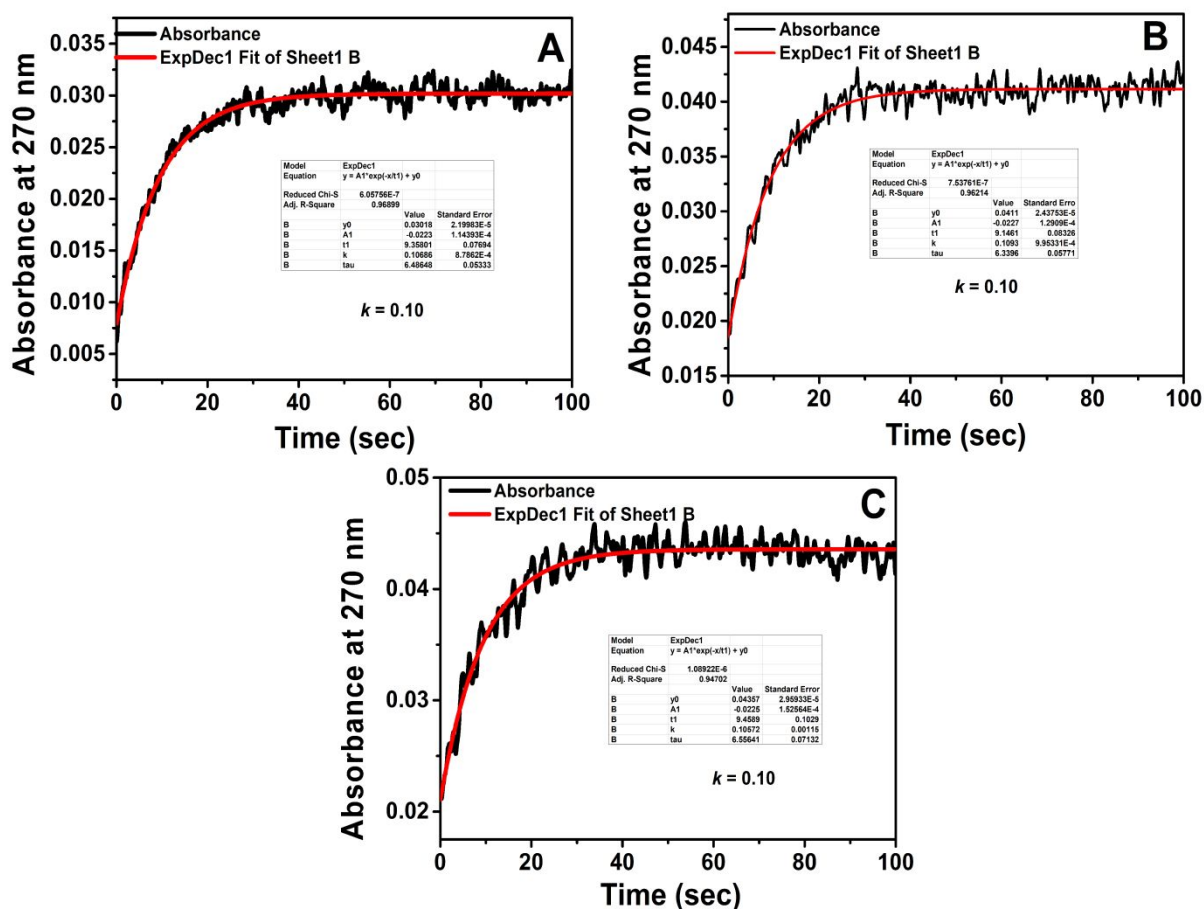

226

227 **Figure S10.** Kinetic curves of the formation of Fe(III) during the reaction of  $\text{Fe}(\text{H}_2\text{O})_6^{2+}$  with  
 228 PDS in the absence of bicarbonate at different pH's (A) pH = 5.80, (B) pH = 7.0 and (C) pH  
 229 = 8.40. (Experimental initial concentrations in the Fenton solutions:  $[\text{PDS}] = 1.0 \text{ mM}$ ,  $[\text{Fe}^{\text{II}}_{\text{aq}}]$   
 230 = 0.10 mM)

231

232

233

234

235

236

237

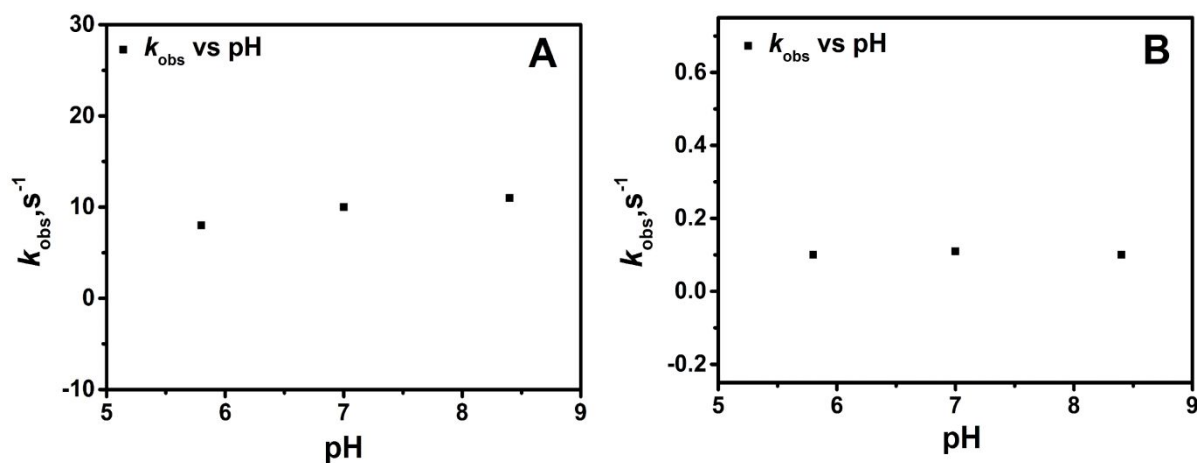

238

239 **Figure S11.** Dependence of  $k_{\text{obs}}$  on the pH in the absence of bicarbonate at a constant

240 concentration of (A) PMS ( $[\text{PMS}] = 0.20 \text{ mM}$ ,  $[\text{Fe}^{\text{II}}_{\text{aq}}] = 0.020 \text{ mM}$ ) and (B) PDS ( $[\text{PDS}] =$

241  $1.0 \text{ mM}$ ,  $[\text{Fe}^{\text{II}}_{\text{aq}}] = 0.10 \text{ mM}$ )

242

243

244

245

246

247

248

249

250

251

252

253

254

255

256

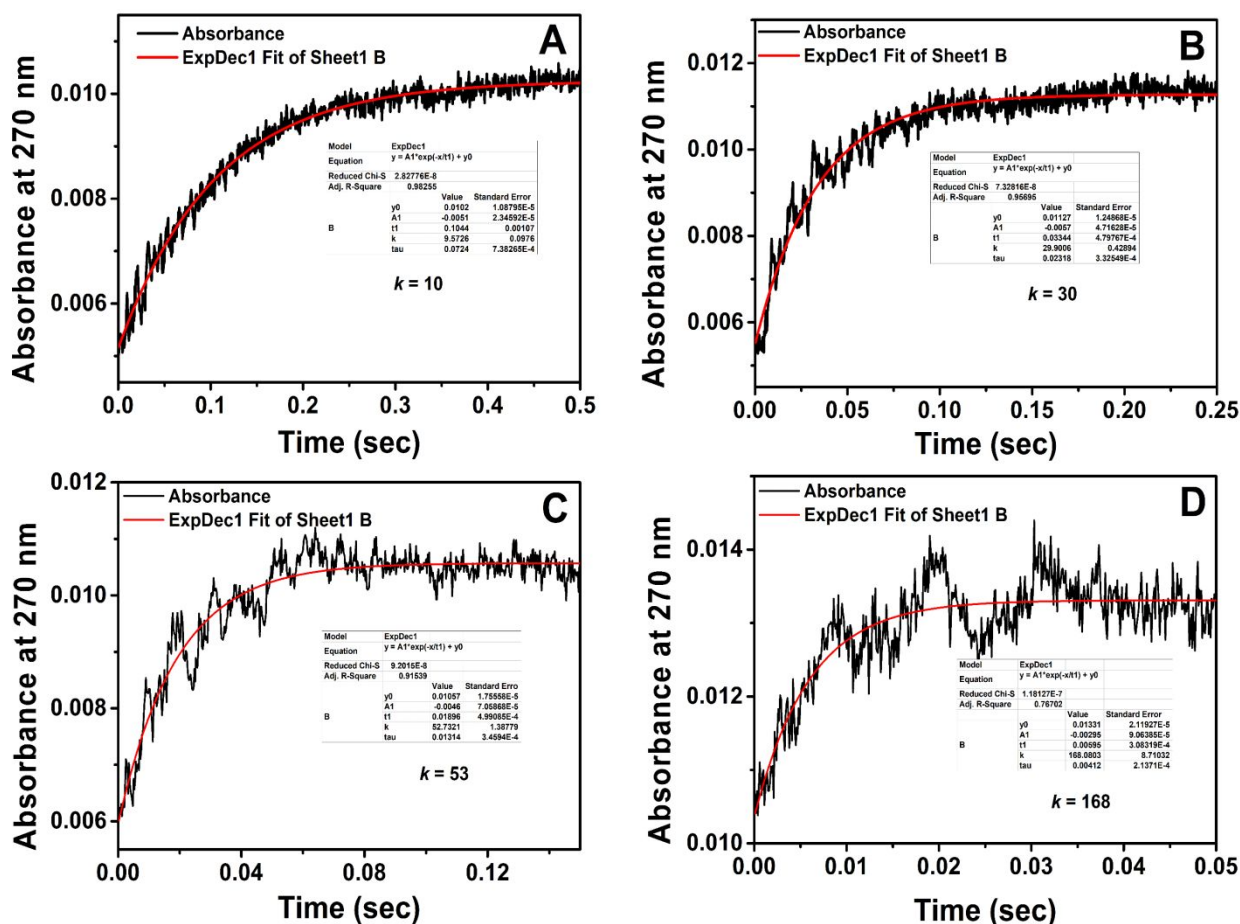

257

258 **Figure S12.** Typical kinetic curve of the reaction of  $\text{Fe}(\text{H}_2\text{O})_6^{2+}$  with PMS in presence of excess

259 PMS taken by stopped flow instrument with different concentration of (A) 0 mM  $\text{HCO}_3^-$  (B)

260 0.10 mM  $\text{HCO}_3^-$  (C) 0.20 mM  $\text{HCO}_3^-$  and (D) 0.40 mM  $\text{HCO}_3^-$ . The initial concentrations in

261 the Fenton solutions are  $[\text{Fe}^{\text{II}}] = 0.020$  mM,  $[\text{PMS}] = 0.20$  mM. The data of the conventional

262 spectrophotometric measurements were analyzed graphically, and the  $k$  values were

263 determined by fitting single exponential curves to the absorbance vs. time plots.

264

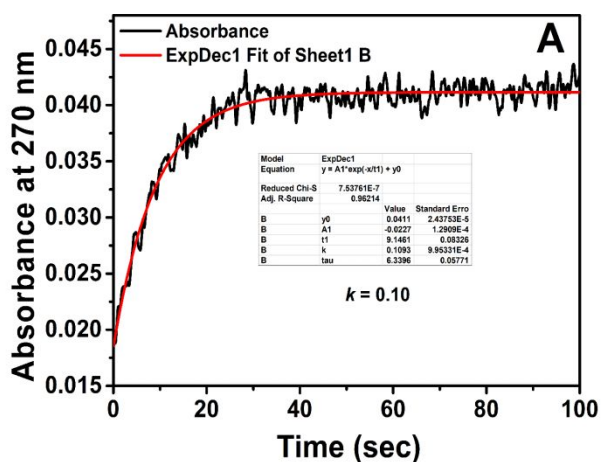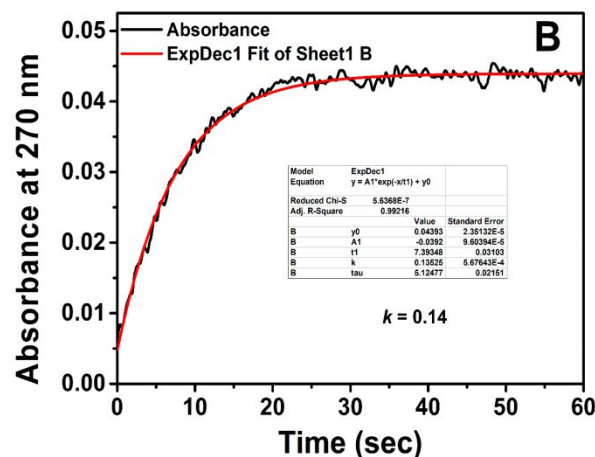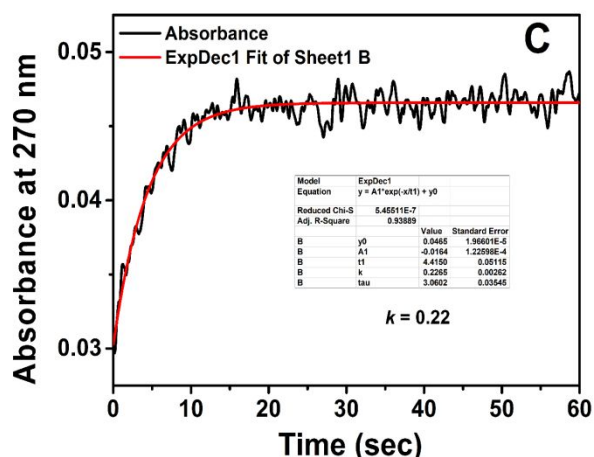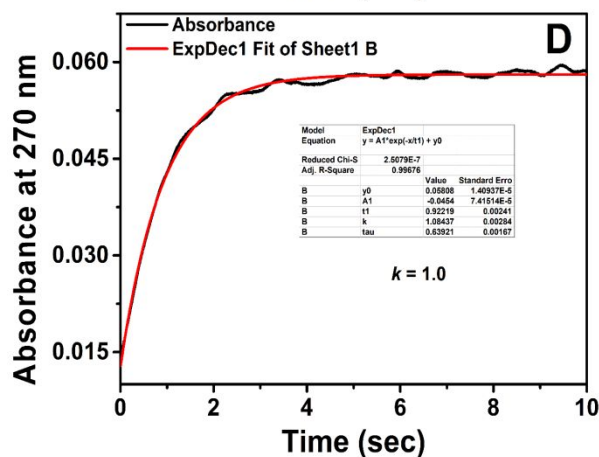

265

266

267 **Figure S13.** Typical kinetic curve of the reaction of  $\text{Fe}(\text{H}_2\text{O})_6^{2+}$  with PDS in presence of excess  
 268 PDS taken by stopped flow instrument with different concentration of (A) 0 mM  $\text{HCO}_3^-$  (B)  
 269 1.0 mM  $\text{HCO}_3^-$  (C) 2.0 mM  $\text{HCO}_3^-$  and (D) 3.0 mM  $\text{HCO}_3^-$ . The initial concentrations in the  
 270 Fenton solutions are  $[\text{Fe}^{\text{II}}] = 0.10$  mM,  $[\text{PDS}] = 1.0$  mM.

271

272

273

274

275

276

277

278

279

280 **Text S1:**

281 ***Mechanism I:***

282 ***Small slope***

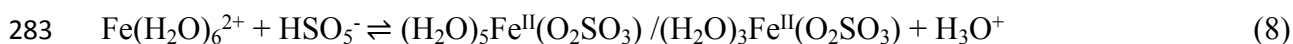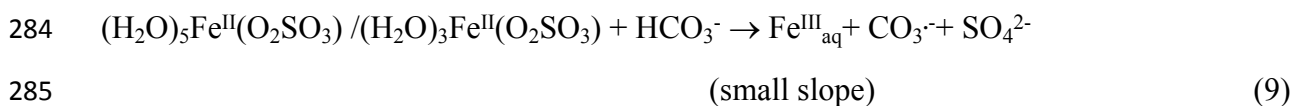

286 Since the rate determining step (rds) is Eq. (9), the overall rate law for this reaction is as  
287 follows:

288 
$$\text{rate} = k_9 [(\text{H}_2\text{O})_5\text{Fe}^{\text{II}}(\text{O}_2\text{SO}_3) / (\text{H}_2\text{O})_3\text{Fe}^{\text{II}}(\text{O}_2\text{SO}_3)] [\text{HCO}_3^-] \quad (9'')$$

289 Since  $(\text{H}_2\text{O})_5\text{Fe}^{\text{II}}(\text{O}_2\text{SO}_3) / (\text{H}_2\text{O})_3\text{Fe}^{\text{II}}(\text{O}_2\text{SO}_3)$  is an intermediate, from eqtn (8),

290 
$$k_8 [\text{Fe}(\text{H}_2\text{O})_6^{2+}] [\text{HSO}_5^-] = k_{-8} [(\text{H}_2\text{O})_5\text{Fe}^{\text{II}}(\text{O}_2\text{SO}_3) / (\text{H}_2\text{O})_3\text{Fe}^{\text{II}}(\text{O}_2\text{SO}_3)] \quad (8'')$$

291 This equation may also be written in the following alternative way,

292 
$$[(\text{H}_2\text{O})_5\text{Fe}^{\text{II}}(\text{O}_2\text{SO}_3) / (\text{H}_2\text{O})_3\text{Fe}^{\text{II}}(\text{O}_2\text{SO}_3)] = K_8 [\text{Fe}(\text{H}_2\text{O})_6^{2+}] [\text{HSO}_5^-]$$

293 Eq. (9'') may be rewritten as,

294 
$$\text{rate} = k_9 K_8 [\text{Fe}(\text{H}_2\text{O})_6^{2+}] [\text{HSO}_5^-] [\text{HCO}_3^-]$$

295

296 ***Large slope***

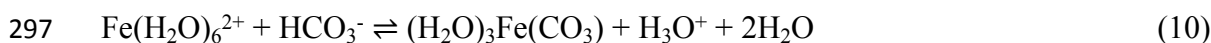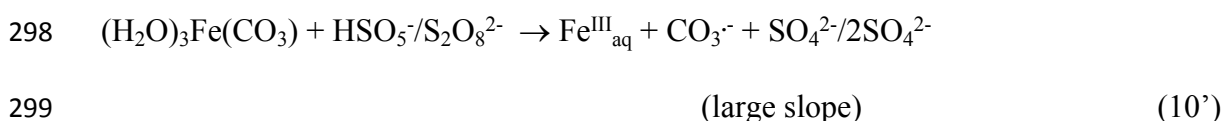

300 The overall rate law of this reaction is as follows:

301 
$$r = k_{10} [(\text{H}_2\text{O})_3\text{Fe}(\text{CO}_3)] [\text{HSO}_5^- / \text{S}_2\text{O}_8^{2-}] \quad (10'')$$

302 Here,  $(\text{H}_2\text{O})_3\text{Fe}(\text{CO}_3)$  is the intermediate formed. Rearranging the equilibrium rate equation

303 (10), the  $[(\text{H}_2\text{O})_3\text{Fe}(\text{CO}_3)]$  is given by,

304 
$$[(\text{H}_2\text{O})_3\text{Fe}(\text{CO}_3)] = K_{10} [\text{Fe}(\text{H}_2\text{O})_6^{2+}] [\text{HCO}_3^-]$$

305 The overall rate of this reaction can be expressed by rearranging the Eq. (10'') as

306 
$$\text{rate} = k_{10} K_{10} [\text{Fe}(\text{H}_2\text{O})_6^{2+}] [\text{HCO}_3^-] [\text{HSO}_5^- / \text{S}_2\text{O}_8^{2-}]$$

307



308 **Text S2**

309 ***Mechanism II:***

310 ***Small slope***

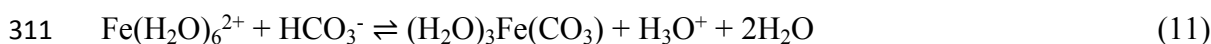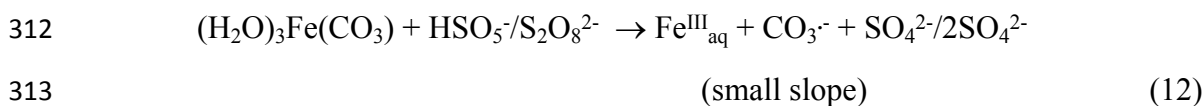

314 The overall rate law for this reaction (rds = (12)) is as follows

315  $r = k_{12} [(\text{H}_2\text{O})_3\text{Fe}(\text{CO}_3)] [\text{HSO}_5^-/\text{S}_2\text{O}_8^{2-}]$  (12')

316 Here,  $(\text{H}_2\text{O})_3\text{Fe}(\text{CO}_3)$  is an intermediate

317 From (11),

318  $r_{\text{forward}} = r_{\text{backward}}$

319  $k_{11} [\text{Fe}(\text{H}_2\text{O})_6^{2+}] [\text{HCO}_3^-] = k_{-11} [(\text{H}_2\text{O})_3\text{Fe}(\text{CO}_3)]$  (12'')

320  $[(\text{H}_2\text{O})_3\text{Fe}(\text{CO}_3)] = K_{11} [\text{Fe}(\text{H}_2\text{O})_6^{2+}] [\text{HCO}_3^-]$

321 Rearrange the Eq. (12') by substituting the value for  $[(\text{H}_2\text{O})_3\text{Fe}(\text{CO}_3)]$ ,

322 **rate =  $k_{12} K_{11} [\text{Fe}(\text{H}_2\text{O})_6^{2+}] [\text{HCO}_3^-] [\text{HSO}_5^-/\text{S}_2\text{O}_8^{2-}]$**

323 ***Large slope***

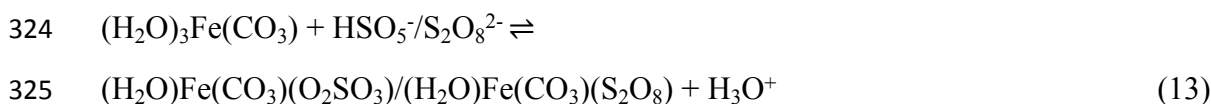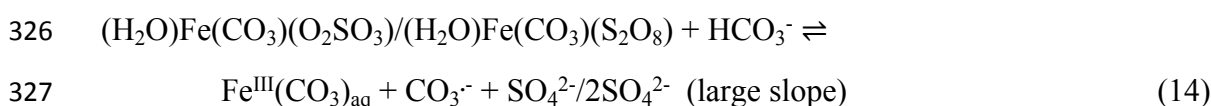

328 Overall rate is as followed:

329  $r = k_{14} [(\text{H}_2\text{O})\text{Fe}(\text{CO}_3)(\text{O}_2\text{SO}_3)/(\text{H}_2\text{O})\text{Fe}(\text{CO}_3)(\text{S}_2\text{O}_8)] [\text{HCO}_3^-]$  (14')

330 Here  $(\text{H}_2\text{O})\text{Fe}(\text{CO}_3)(\text{O}_2\text{SO}_3)/(\text{H}_2\text{O})\text{Fe}(\text{CO}_3)(\text{S}_2\text{O}_8)$  is an intermediate

331 Hence, from Eq. (13)

332  $[(\text{H}_2\text{O})\text{Fe}(\text{CO}_3)(\text{O}_2\text{SO}_3)/(\text{H}_2\text{O})\text{Fe}(\text{CO}_3)(\text{S}_2\text{O}_8)] = K_{13} [(\text{H}_2\text{O})_3\text{Fe}(\text{CO}_3)] [\text{HSO}_5^-/\text{S}_2\text{O}_8^{2-}]$   
 333 (14'')

334 Substitute the  $[(\text{H}_2\text{O})_3\text{Fe}(\text{CO}_3)]$  and  $[(\text{H}_2\text{O})\text{Fe}(\text{CO}_3)(\text{O}_2\text{SO}_3)/(\text{H}_2\text{O})\text{Fe}(\text{CO}_3)(\text{S}_2\text{O}_8)]$  in (14')

335 **rate =  $k_{14} K_{13} K_{11} [\text{Fe}(\text{H}_2\text{O})_6^{2+}] [\text{HCO}_3^-]^2 [\text{HSO}_5^-/\text{S}_2\text{O}_8^{2-}]$**

336

337

338 **Text S3**

339 ***Mechanism III:***

340 ***Small slope***

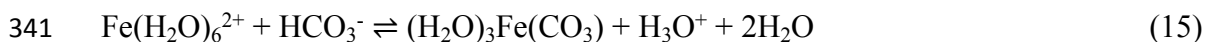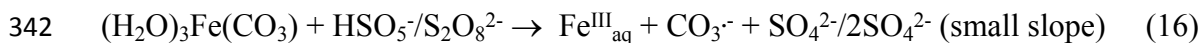

343 The overall rate law for this reaction (rds (16)) is as follows:

344  $r = k_{16} [(\text{H}_2\text{O})_3\text{Fe}(\text{CO}_3)] [\text{HSO}_5^-/\text{S}_2\text{O}_8^{2-}]$  (16')

345 From (15),

346  $[(\text{H}_2\text{O})_3\text{Fe}(\text{CO}_3)] = K_{15}[\text{Fe}(\text{H}_2\text{O})_6^{2+}] [\text{HCO}_3^-]$

347 Eq. (16') may be rewritten as,

348 **rate =  $k_{16}K_{15}[\text{Fe}(\text{H}_2\text{O})_6^{2+}] [\text{HCO}_3^-] [\text{HSO}_5^-/\text{S}_2\text{O}_8^{2-}]$**

349

350 ***Large slope***

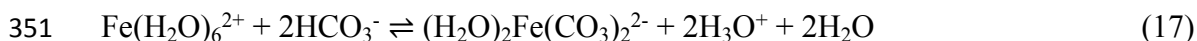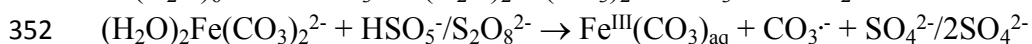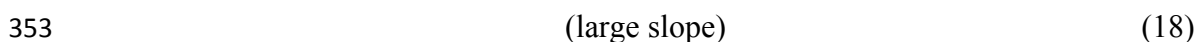

354 Overall rate law (rds (18)) will be

355  $r = k_{18}[(\text{H}_2\text{O})_2\text{Fe}(\text{CO}_3)_2^{2-}] [\text{HSO}_5^-/\text{S}_2\text{O}_8^{2-}]$  (18')

356 From (17),

357  $[(\text{H}_2\text{O})_2\text{Fe}(\text{CO}_3)_2^{2-}] = k_{17} [\text{Fe}(\text{H}_2\text{O})_6^{2+}] [\text{HCO}_3^-]^2 / k_{-17}$

358 Eq. (18') may be rewritten as,

359 **rate =  $k_{18}K_{17}[\text{Fe}(\text{H}_2\text{O})_6^{2+}] [\text{HCO}_3^-]^2 [\text{HSO}_5^-/\text{S}_2\text{O}_8^{2-}]$**

360

361

362

363

364

365

366

367

368

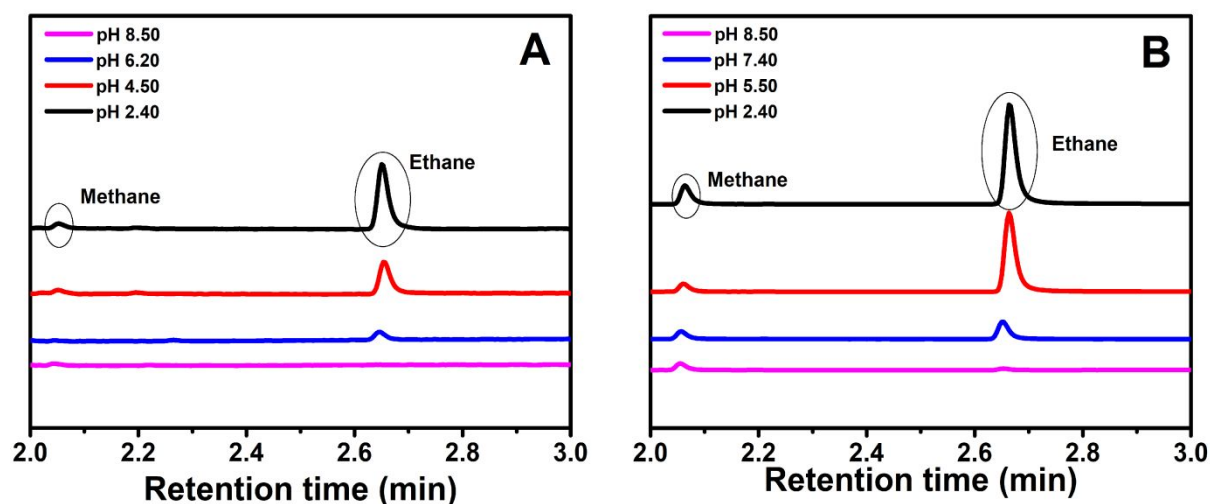

369  
 370 **Figure S14.** GC determination of methane and ethane with FID detector at four different pH  
 371 in the absence of  $\text{HCO}_3^-$  after the Fenton reaction of (A)  $\text{Fe}^{2+}$  and  $\text{HSO}_5^-$  and (B)  $\text{Fe}^{2+}$  and  
 372  $\text{S}_2\text{O}_8^{2-}$  in presence of excess  $\text{Fe}^{\text{II}}_{\text{aq}}$  and  $(\text{CH}_3)_2\text{SO}$ .  $[\text{Fe}^{\text{II}}] = 0.50 \text{ mM}$ ,  $[\text{HSO}_5^-/\text{S}_2\text{O}_8^{2-}] = 0.10 \text{ mM}$ ,  
 373  $[(\text{CH}_3)_2\text{SO}] = 25.0 \text{ mM}$ .

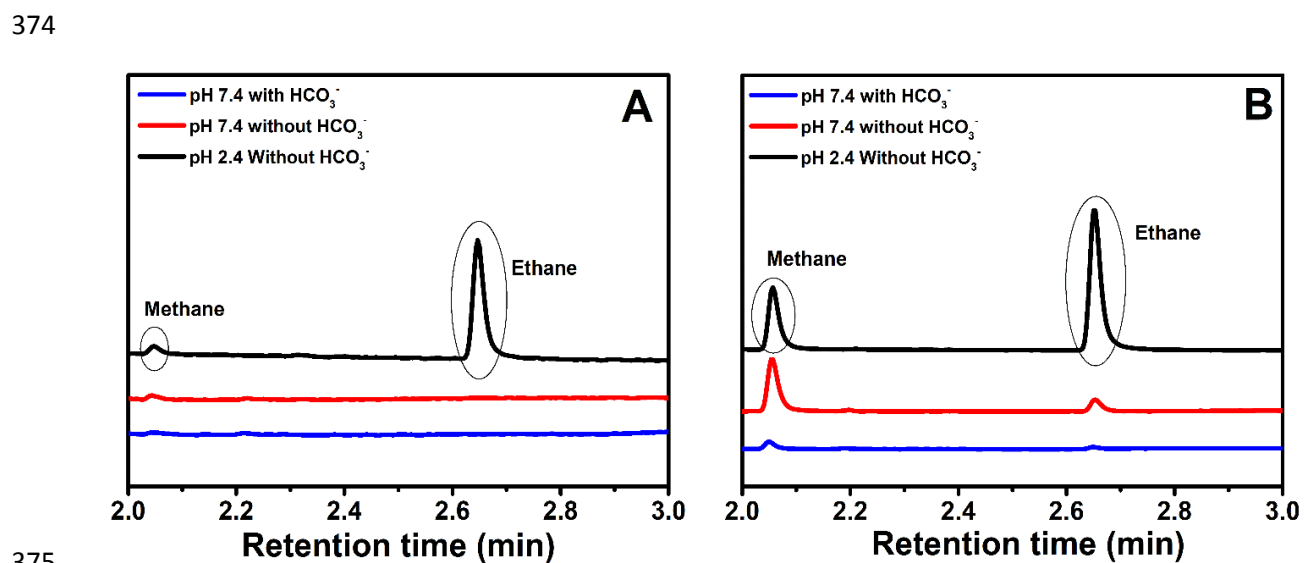

375  
 376 **Figure S15.** GC determination of methane and ethane with FID detector at pH 2.2 and at neutral  
 377 pH in the absence and presence of  $\text{HCO}_3^-$  after the Fenton reaction of (A)  $\text{Fe}^{2+}$  and  $\text{HSO}_5^-$  and  
 378 (B)  $\text{Fe}^{2+}$  and  $\text{S}_2\text{O}_8^{2-}$  in presence of excess  $\text{Fe}^{\text{II}}_{\text{aq}}$  and  $(\text{CH}_3)_2\text{SO}$ .  $[\text{Fe}^{\text{II}}] = 0.50 \text{ mM}$ ,  $[\text{HSO}_5^-/\text{S}_2\text{O}_8^{2-}] = 0.10 \text{ mM}$ ,  
 379  $[(\text{CH}_3)_2\text{SO}] = 25.0 \text{ mM}$ ,  $[\text{HCO}_3^-] = 3.0 \text{ mM}$ .  
 380

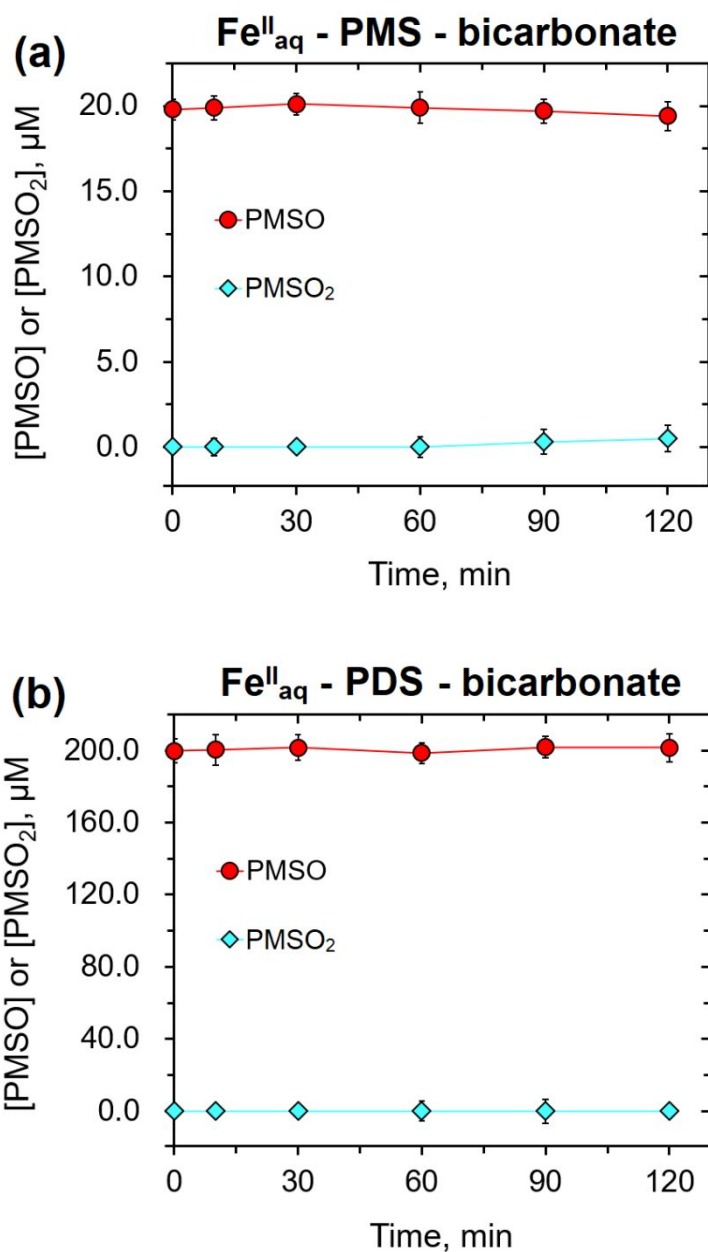

381

382 **Figure S16.** The changes in concentrations of PMSO and PMSO<sub>2</sub> in the (a)  $\text{Fe}^{\text{II}}_{\text{aq}}$  - PMS and  
 383 (b)  $\text{Fe}^{\text{II}}_{\text{aq}}$  - PDS systems in presence of high bicarbonate concentrations (Initial pH = 7.0. The  
 384 PMS system:  $[\text{PMS}]_0 = 0.04 \text{ mM}$ ;  $[\text{Fe}^{\text{II}}_{\text{aq}}]_0 = 0.2 \text{ mM}$ ;  $[\text{bicarbonate}]_0 = 20.0 \text{ mM}$ ;  $[\text{PMSO}]_0 =$   
 385  $20.0 \mu\text{M}$ . The PDS system:  $[\text{PMS}]_0 = 1.0 \text{ mM}$ ;  $[\text{Fe}^{\text{II}}_{\text{aq}}]_0 = 2.0 \text{ mM}$ ;  $[\text{bicarbonate}]_0 = 200.0 \text{ mM}$ ;  
 386  $[\text{PMSO}]_0 = 200.0 \mu\text{M}$ )).

387

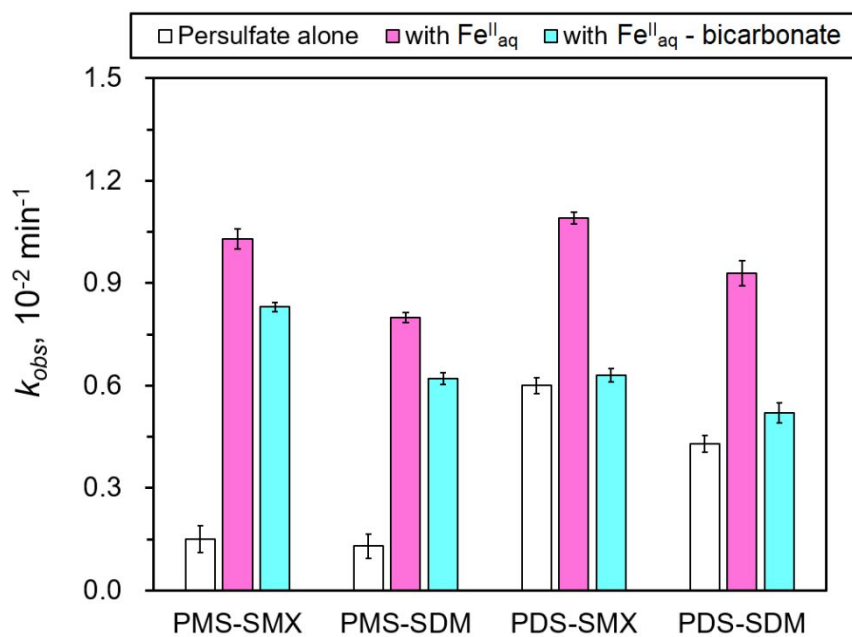

388

389 **Figure S17.** The pseudo-first-order rate constants of the degradation of SMX and SDM by  
 390 different persulfate systems ( $[\text{SMX}]_0 = [\text{SDM}]_0 = 5.0 \mu\text{M}$ ; initial pH = 7.0. The PMS system:  
 391  $[\text{PMS}]_0 = 0.04 \text{ mM}$ ;  $[\text{Fe}^{\text{II}}_{\text{aq}}]_0 = 0.2 \text{ mM}$ ;  $[\text{bicarbonate}]_0 = 0.5 \text{ mM}$ . The PDS system:  $[\text{PDS}]_0 =$   
 392  $1.0 \text{ mM}$ ;  $[\text{Fe}^{\text{II}}_{\text{aq}}]_0 = 2.0 \text{ mM}$ ;  $[\text{bicarbonate}]_0 = 5.0 \text{ mM}$ ).

393

394
